# Supplementary material for: May arsenic pollution contribute to limiting Artemia franciscana invasion in southern Spain?
Source: PeerJ. 2016 Feb 18;4:e1703. doi: 10.7717/peerj.1703 (PMC4768694; doi:10.7717/peerj.1703)
Supplement: Supplemental Information 1 — Data sets for toxicity tests. [file peerj-04-1703-s001.xlsx]

## Sheet: LC50 Nauplii 25 AF
REPLICAT	Concentration	TOT	Nbx mort	% mort	Correction	n
0	0	66	10	15	0	100
1	0.12	59	23	39	28	100
2	0.23	60	20	33	21	100
3	0.47	64	23	36	24	100
4	0.94	73	15	21	6	100
5	1.88	65	10	15	0	100
6	3.75	57	10	18	3	100
7	7.5	49	17	35	23	100
8	15	58	23	40	28.8793
9	30	51	34	67	60.7143

## Sheet: LC50 Nauplii 25 APCG
réplicats	Concentration	TOT	Nbx mort	% mort	Correction	n
0	0	37	3	8	0	100
1	0.47	31	5	16	9	100
2	0.94	31	1	3	0	100
3	1.88	35	3	9	1	100
4	3.75	38	10	26	20	100
5	7.5	35	24	69	66	100
6	15	34	22	65	62	100
7	30	35	30	86	84	100

## Sheet: LC50 Nauplii 25 APOD
concentration	REPLICAT	TOT	Nbx mort	% mort	Correction	n
0	0	79	4	5	0	100
7.2	1	47	8	17	13	100
14.4	2	50	20	40	37	100
21.6	3	45	16	36	32	100
28.8	4	47	29	62	60	100
36	5	49	26	53	51	100
43.2	6	50	39	78	77	100
50.4	7	50	43	86	85	100
57.6	8	50	36	72	71	100
64.8	9	79	70	89	88	100
72	10	32	31	97	97	100
79.2	11	27	27	100	100	100

## Sheet: LC50 Nauplii 29 AF
Replicat	Concentration	Nbx mort	tot	% mort	Correction	n
0	0	10	46	21.7391	0	100
1	0.47	19	59	32.2034	13.371	100
2	0.94	20	58	34.4828	16.2835	100
3	1.88	24	62	38.7097	21.6846	100
4	3.75	17	49	34.6939	16.5533	100
5	7.5	39	64	60.9375	50.0868	100
6	15	63	80	78.75	72.8472	100
7	30	59	67	88.0597	84.743	100

## Sheet: LC50 Nauplii 29 APCG
Replicat	Concentration	TOT	Nbx mort	% mort	Correction ?	n
0	0	29	3	10.3448	0	100
1	0.47	36	2	5.55556	0	100
2	0.94	32	4	12.5	2.40385	100
3	1.88	36	4	11.1111	0.854701	100
4	3.75	50	5	10	-0.384615	100
5	7.5	42	11	26.1905	17.674	100
6	15	56	24	42.8571	36.2637	100
7	30	45	32	71.1111	67.7778	100

## Sheet: LC50 Nauplii 29 APOD
Replicat	Concentration	Nbx mort	tot	% mort	Correction ?	n
0	0	17	106	16.0377	0	100
1	0.47	12	51	23.5294	8.92267	100
2	0.94	12	43	27.907	14.1364	100
3	1.88	25	60	41.6667	30.5243	100
4	3.75	21	56	37.5	25.5618	100
5	7.5	26	54	48.1481	38.2439	100
6	15	26	51	50.9804	41.6171	100
7	30	15	37	40.5405	29.1831	100
8	60	59	59	100	100	100
9	120	59	59	100	100	100

## Sheet: LC50 Juvenile AP 25
Replicat	Concentration	TOT	Nbx mort	% mort	Correction	n
0	0	33	2	6	0	100
1	3.75	27	2	7	0	100
2	7.5	28	3	11	5	100
3	15	30	1	3	-3	100
4	30	26	3	12	6	100
5	60	27	10	37	33	100
6	120	31	25	81	79	100

## Sheet: LC50 Juvenile 25 AF
réplicat	Concentration	TOT	Nbx mort	% mort	Correction	n
1	0	38	7	18.4211	0	100
2	0.16	43	0	0	-22.5806	100
3	0.31	41	1	2.43902	-19.5909	100
4	0.61	43	3	6.97674	-14.0285	100
5	1.25	38	9	23.6842	6.45161	100
6	2.5	38	6	15.7895	-3.22581	100
7	5	36	9	25	8.06452	100
8	10	40	3	7.5	-13.3871	100
9	20	41	5	12.1951	-7.63179	100
10	30	45	2	4.44444	-17.1326	100

## Sheet: LC50 Juvenile 29 AF
Replicat	Concentration	TOT	Nbx mort	% mort	Correction	n
0	0	35	0	0	0	100
1	1.88	31	2	6.45161	0	100
2	3.75	28	2	7.14286	7.14286	100
3	7.5	28	0	0	0	100
4	15	23	8	34.7826	34.7826	100
5	30	27	10	37.037	37.037	100
6	60	30	27	90	90	100
7	120	34	34	100	100	100

## Sheet: LC50 Adulte 25 AF
Replicat	Concentration	TOT	Nbx mort	% mort	Correction	n
0	0	30	6	20	0	100
1	4.69	29	2	6.89655	-16.3793	100
2	9.38	27	7	25.9259	7.40741	100
3	18.75	43	8	18.6047	-1.74419	100
4	37.5	30	12	40	25	100
5	75	33	10	30.303	12.8788	100
6	150	34	20	58.8235	48.5294	100
7	300	25	17	68	60	100
8	600	26	24	92.3077	90.3846	100

[truncated: 5 more sheets: Cysts, test survival chronic, test growth chronic, test final size chronic, test final survival chronic]
